# Supplementary material for: A novel mechanism of spin-orientation dependence of O2 reactivity from first principles methods
Source: Royal Society of Chemistry journal article supplement (doi:10.1039/c6cy01198e), 2016-08-25
Supplement: c6cy01198e1.pdf [file c6cy01198e1.pdf]

## I.

**Table 1** Comparison of O<sub>2</sub> and Ni properties with experiments in isolated and adsorbed states.

|                                  | Ni                  | EXP.                           | O <sub>2</sub>      | EXP.    |
|----------------------------------|---------------------|--------------------------------|---------------------|---------|
| Lattice parameter                | 3.52 Å              | 3.52 Å [1]                     |                     |         |
| Surface relaxation (111)         | 0.010 Å             | 0.007±0.003 Å [2]              |                     |         |
| Spin moment /atom (bulk)         | 0.60 μ <sub>B</sub> | 0.60-0.62 μ <sub>B</sub> [1,3] |                     |         |
| Bond-length                      |                     |                                | 1.23 Å              | 1.21[4] |
| Spin-moment (gas-phase)          |                     |                                | 1.96 μ <sub>B</sub> |         |
| O atom on Ni(111)                |                     |                                |                     |         |
| O-Ni bond length                 |                     | 1.86-1.89 Å                    | 1.85 ± 0.05 Å [5]   |         |
| O atom vertical distance from Ni |                     | 1.20 Å                         | 1.21 ± 0.09 Å [5]   |         |

## References

- [1] F Starrost, H Kim, S C Watson, E Kaxiras and E A Carter, *Phys. Rev. B*, 2001, 64, 235105.
- [2] T Okazawa, F Takeuchi and Y. Kido *Phys. Rev. B*, 2005, 72, 075408.
- [3] M Donath *Sur. Sci. Rep.* 1994, 20, 251.
- [4] CRC Handbook of Chemistry and Physics, 86th ed., CRC Press, Boca Raton, FL, 2005.
- [5] M Pedio, L Becker, B Hillert, S D Addato and J Haase *Phys. Rev. B*, 1990, 41, 7462.

## II.

Further discussions for Equation (1) in the manuscript:

The  $F_I(r - r_I)$  is a function with a norm (or value) 1 inside the sphere  $\Omega_I$  and smoothly goes to zero at the boundary so that when it is multiplied to the magnetization density,  $m(r)$  in

equation (1), we get the 
$$M_I = \int_{\Omega_I} m(r) d^3r$$
 inside the  $\Omega_I$  and 0 at the boundary as expected.

The appropriate form of  $F_I$  is  $\frac{\sin(x)}{x}$  because the limit of this function as  $x \rightarrow 0$  is 1 and 0 at  $x = \pi$  and from 0 to  $\pi$ , it decreases smoothly (monotonically). The  $x = \pi(|r - r_I|)/R_I$ , where  $R_I$  is the radius of the sphere,  $\Omega_I$ , can describe such condition for  $F_I$ . If  $r$  tends to  $r_I$  (inside

sphere),  $x \rightarrow 0$ ,  $F_I(r - r_I) = 1$  and 
$$M_I = \int_{\Omega_I} m(r) d^3r$$
. If  $|r - r_I| = R_I$  (boundary),  $x = \pi$ ,  $F_I(r - r_I) = 0$ , so  $M_I = 0$ .
